# Supplementary figures and images for: Effect of Certolizumab Pegol Over Ninety-Six Weeks in Patients With Axial Spondyloarthritis: Results from a Phase III Randomized Trial
Source: PubMed Central journal article supplement — Arthritis Rheumatol. 2015 Feb 25;67(3):668–77. doi: 10.1002/art.38973 (PMC4365732; doi:10.1002/art.38973), 2015-02-25

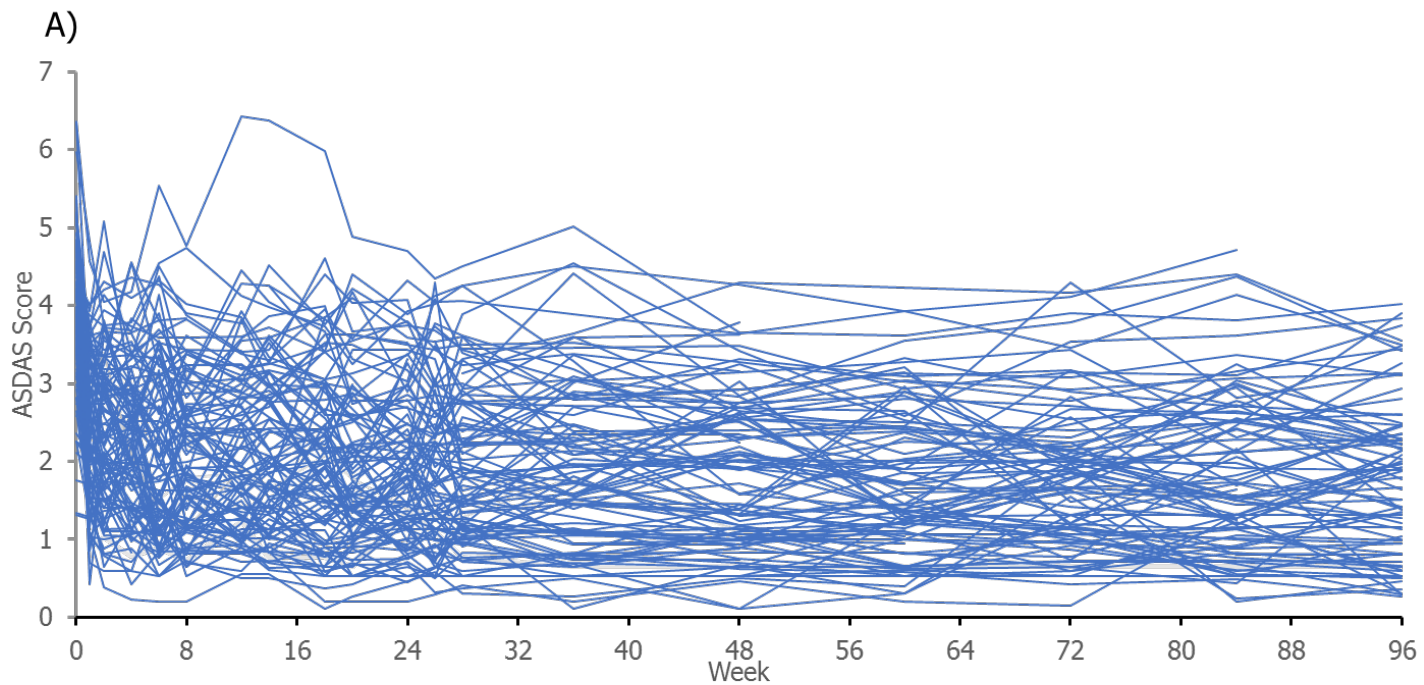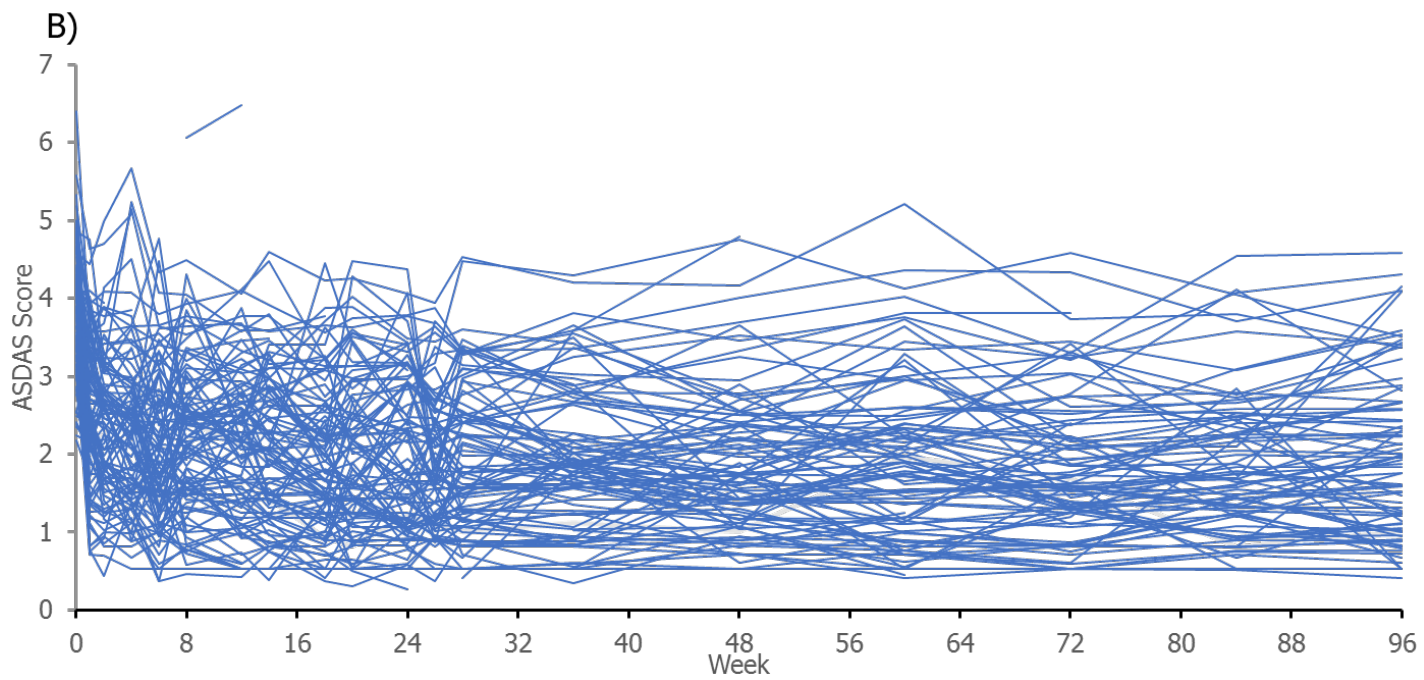

Supplement: art0067-0668-sd1.pdf [file art0067-0668-sd1.pdf]
